# Supplementary material
Source: PubMed Central journal article supplement (PMC4755110)

# Source data – figure6

Figure 6A

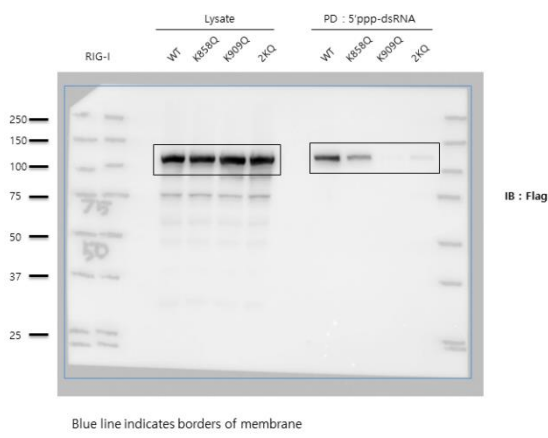

Figure 6B

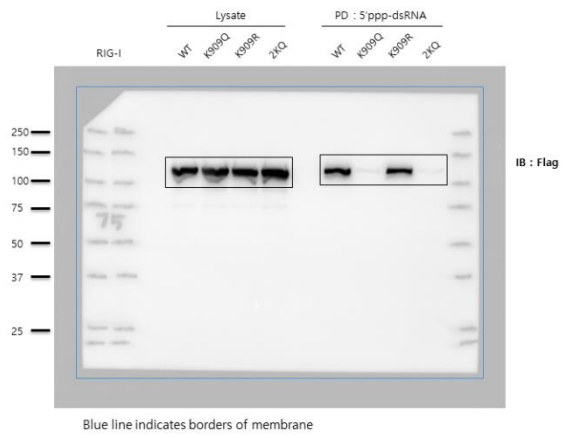

Figure 6C - Flag

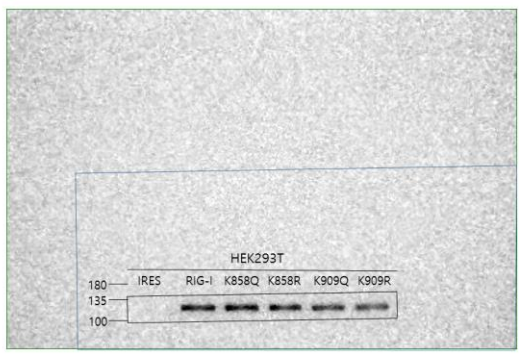

Figure 6C - RIG-I

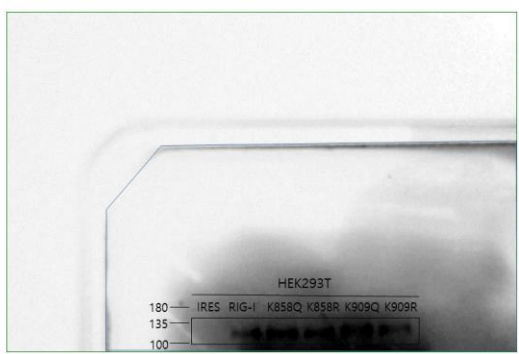

Figure 6C - Actin

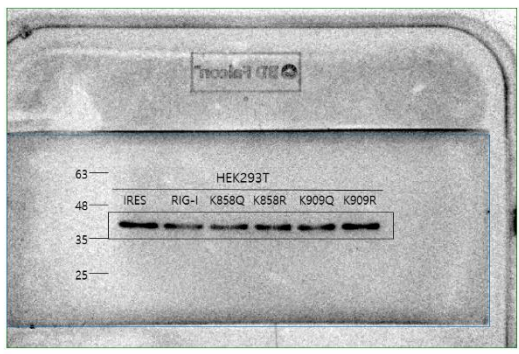

Figure 6E

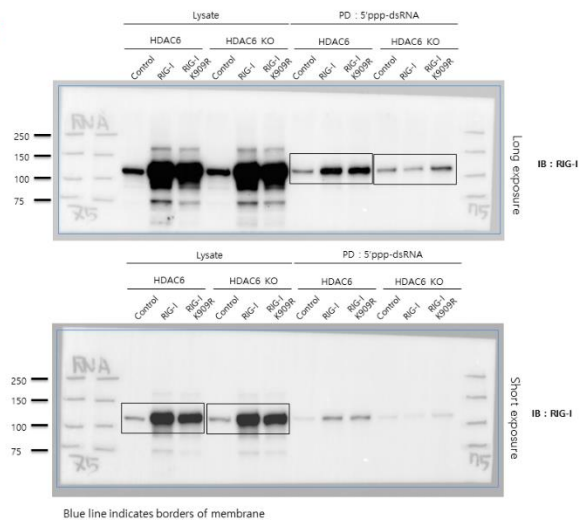

Figure 6E

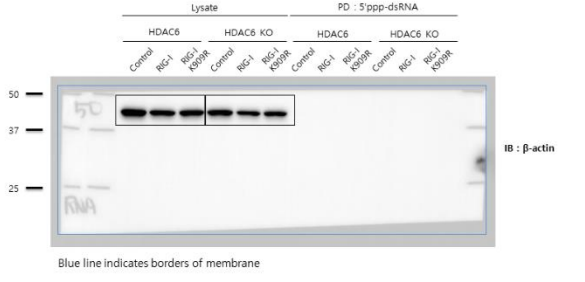

Blue line indicates borders of membrane

# Source data – figure6

Figure 6F-IP: Ac909K

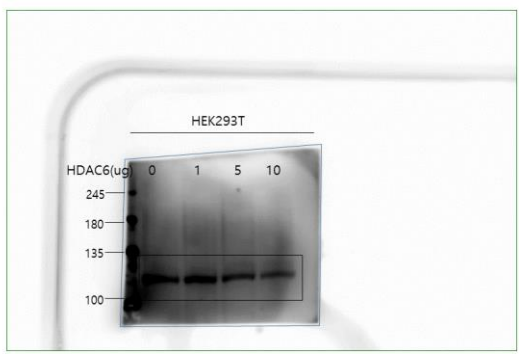

Figure 6F-IP: V5-HDAC6

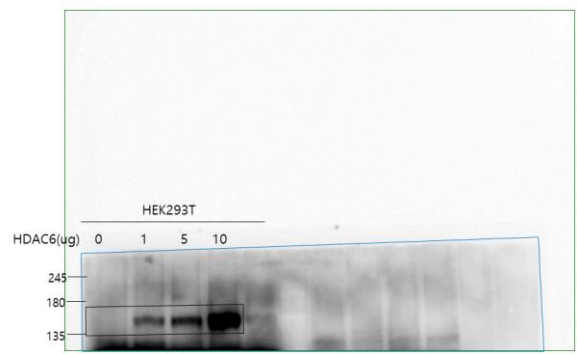

Figure 6F-IP: Flag-RIG-I

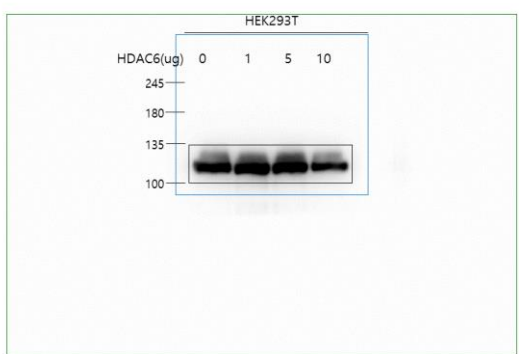

Figure 6F-WCL: V5-HDAC6

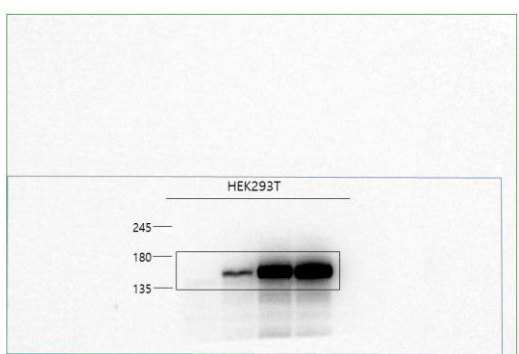

Figure 6F-WCL: Flag-RIG-I

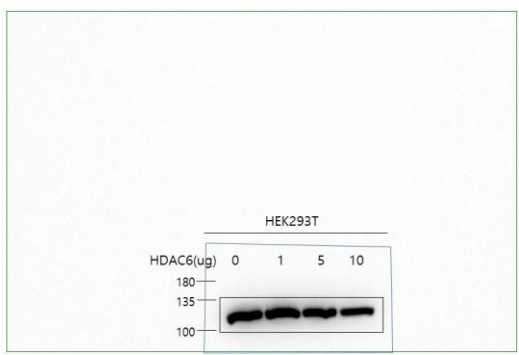

Figure 6F-WCL: b-actin

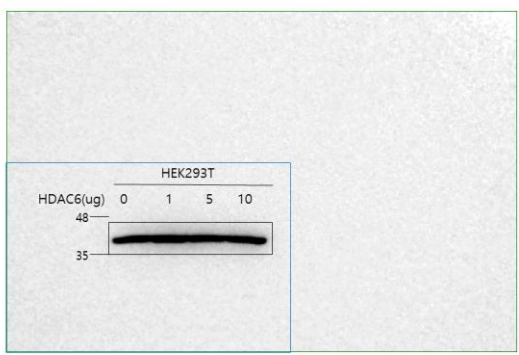

# Source data – figure6

Figure 6G-IP: Ac909K

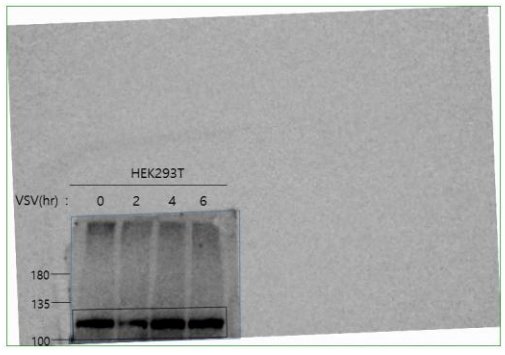

Figure 6G-IP: Flag

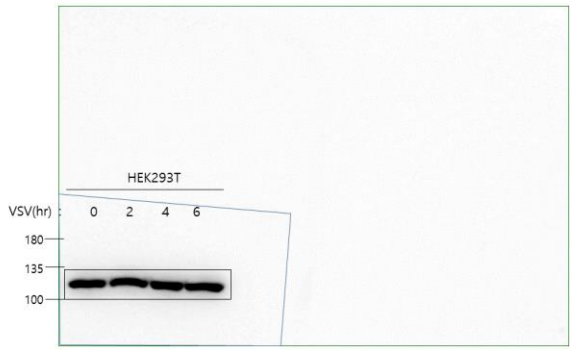

Figure 6G-WCL: FLAG-RIG-I

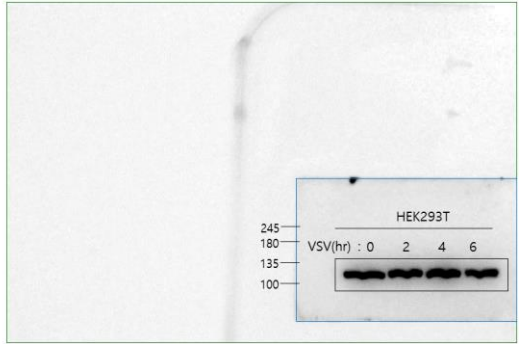

Figure 6G-WCL: Actin

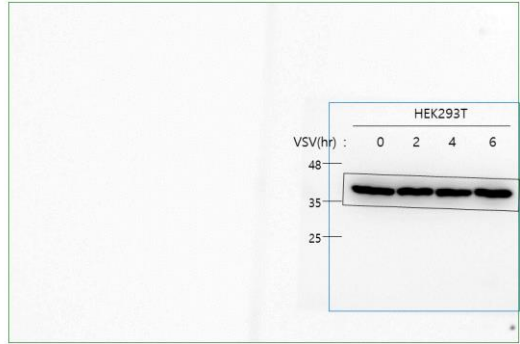

Figure 6H-IP: Ac909K

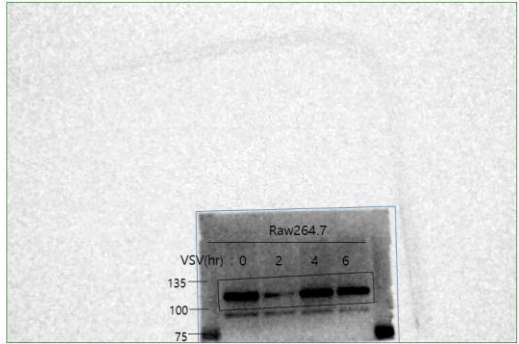

Figure 6H-IP: RIG-I

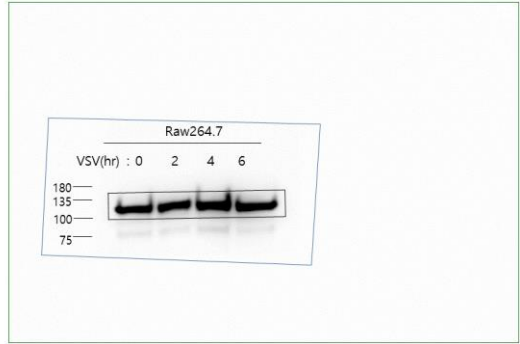

Figure 6H-WCL: RIG-I

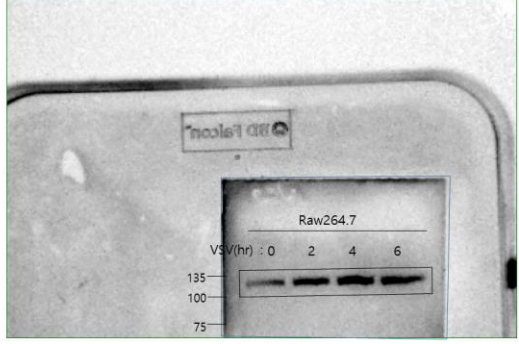

Figure 6G-WCL: actin

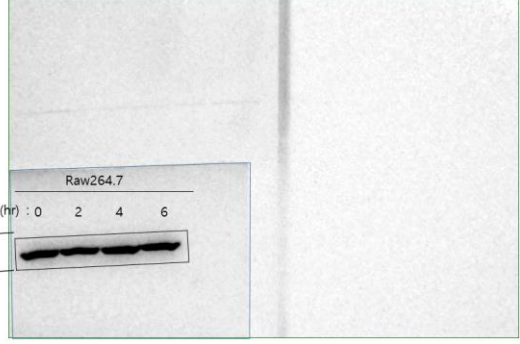

Supplement: EMBJ-35-429-s006.pdf [file EMBJ-35-429-s006.pdf]
