# Supplementary material
Source: PubMed Central journal article supplement (PMC4755110)
Supplement: EMBJ-35-429-s005.pdf [file EMBJ-35-429-s005.pdf]

# Source data – figure5

Figure 5A

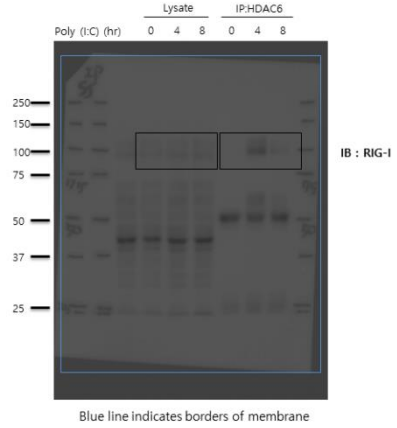

Figure 5A

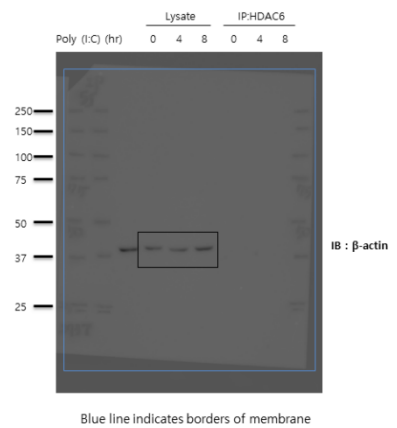

Figure 5A

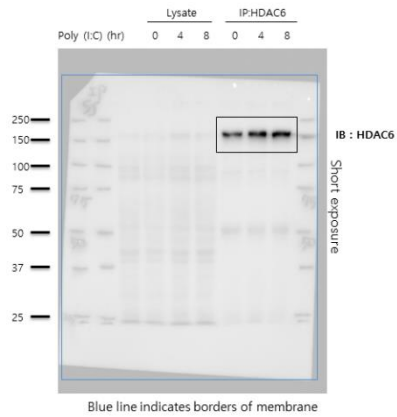

Figure 5A

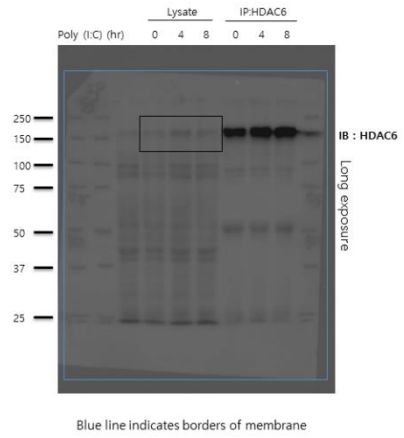

Figure 5B

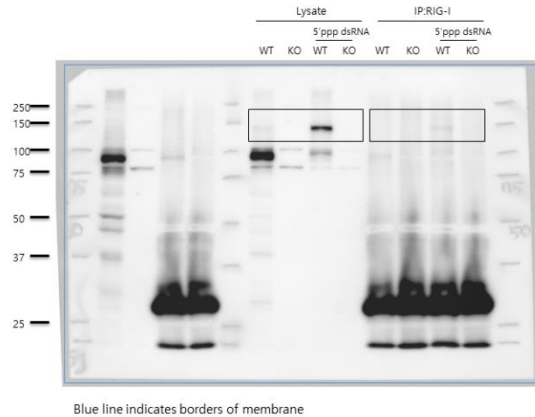

Figure 5B

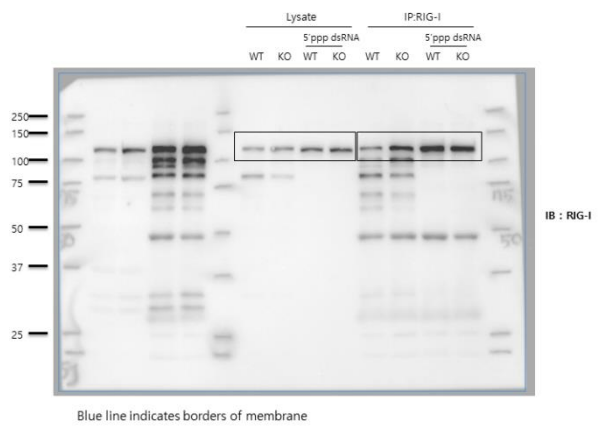

# Source data – figure5

Figure 5E

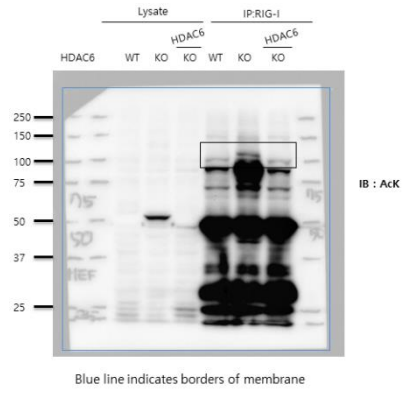

Figure 5E

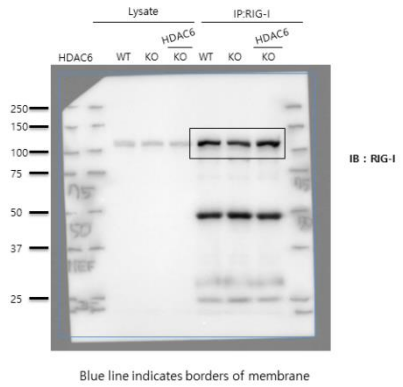

Figure 5E

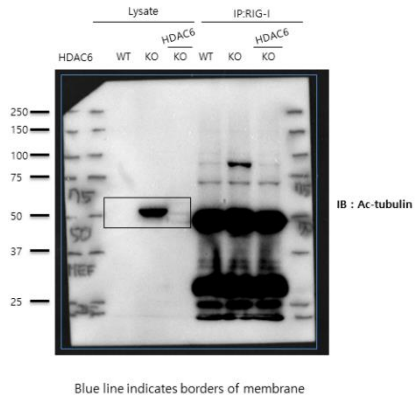

Figure 5F

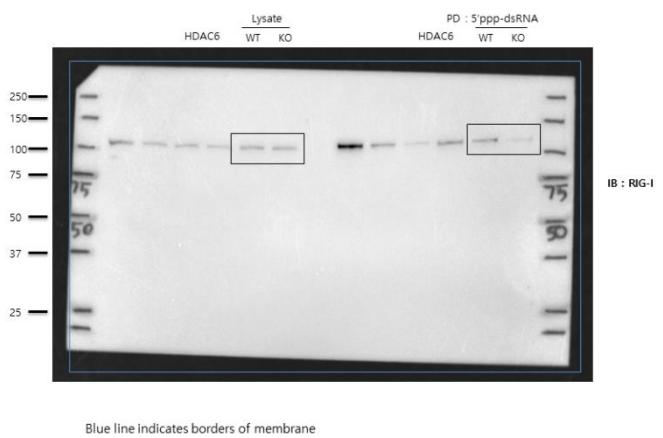

Figure 5F

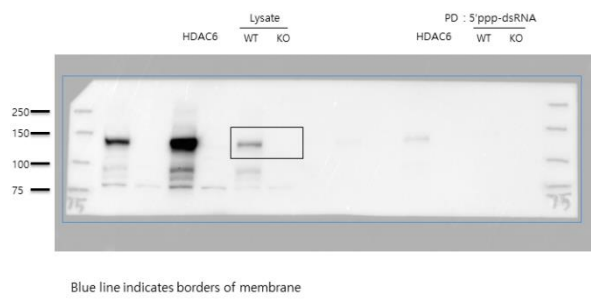

Figure 5F

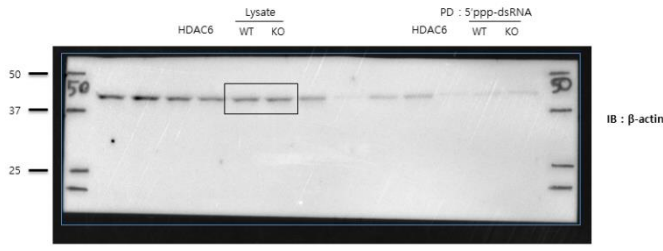

# Source data – figure5

Figure 5G

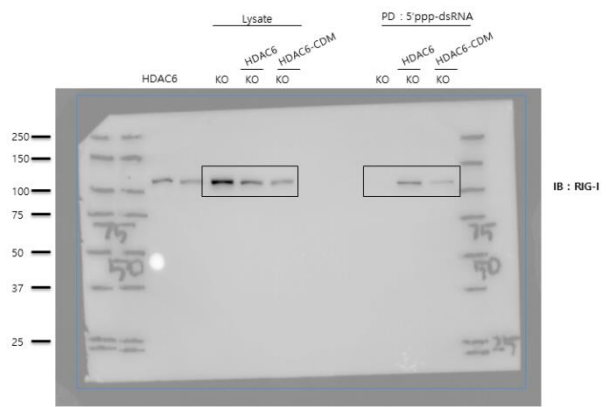

Figure 5G

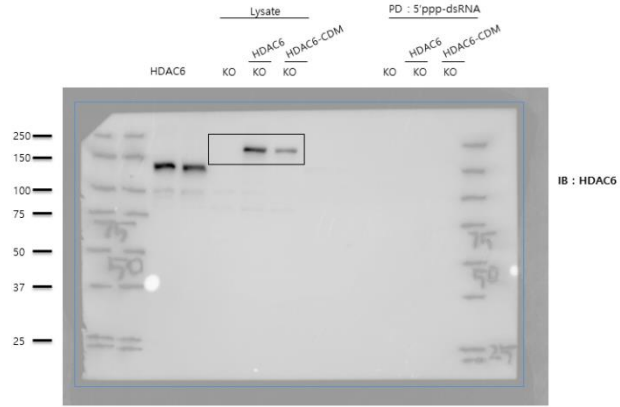

Blue line indicates borders of membrane

Blue line indicates borders of membrane
