# Supplementary material
Source: PubMed Central journal article supplement (PMC4755110)

# Source data - figure2

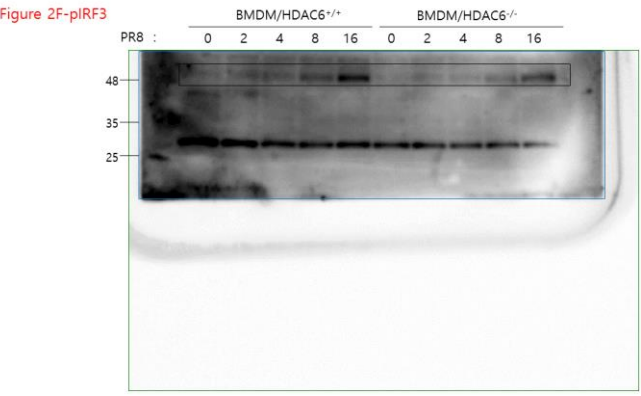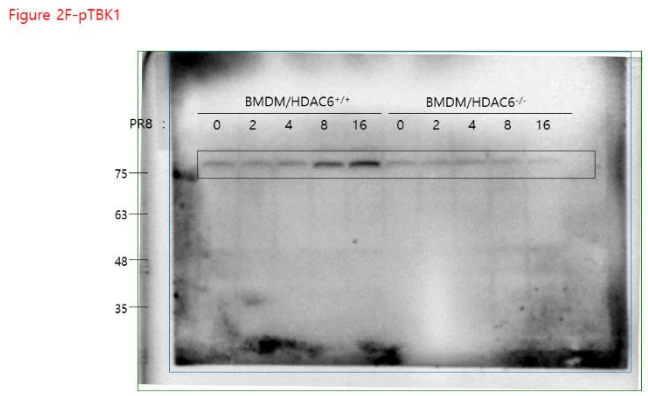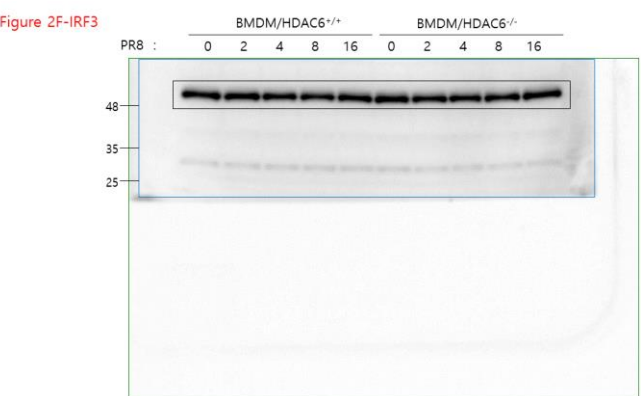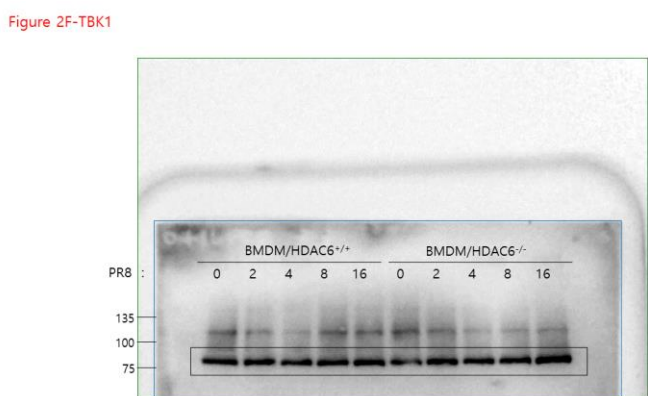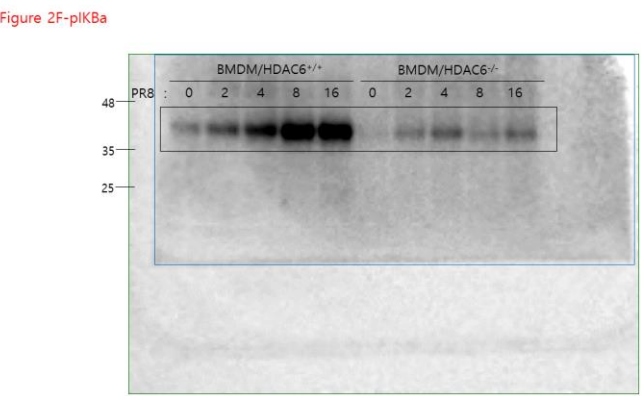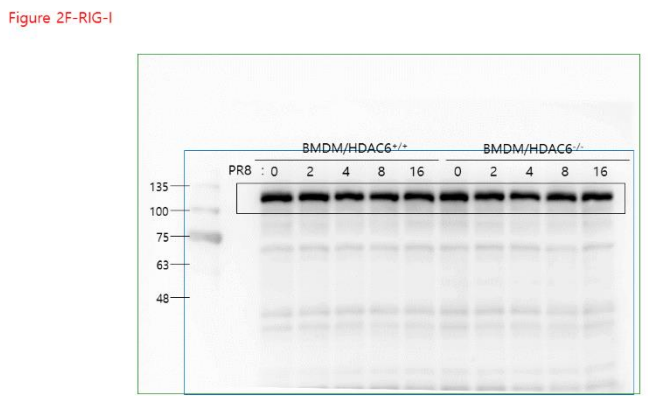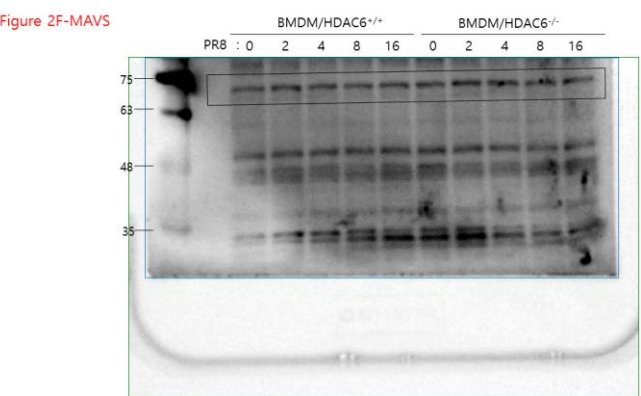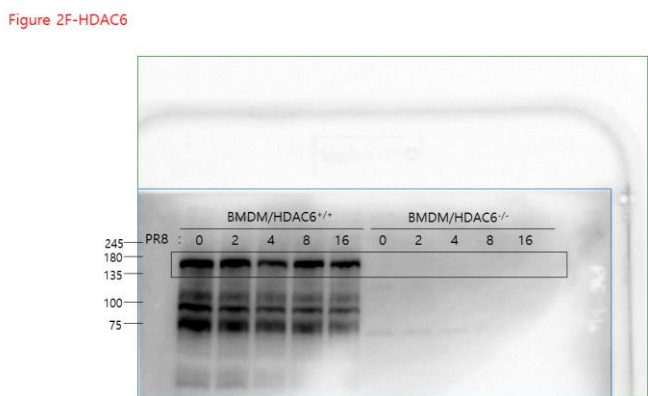

# Source data - figure2

Figure 2F-actin

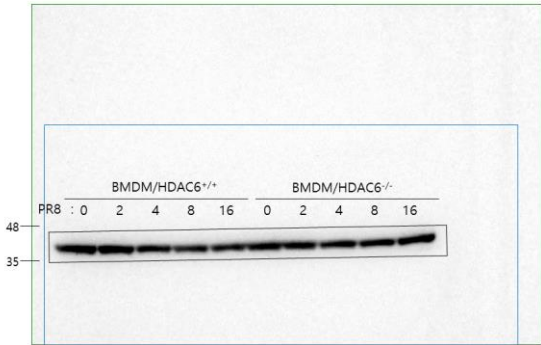

Blue line indicates borders of membrane

Supplement: EMBJ-35-429-s004.pdf [file EMBJ-35-429-s004.pdf]
